# Supplementary material
Source: publisher figshare collection journal article supplement (https://acs.figshare.com/ndownloader/files/4680241)

**The NMR solution structure of subunit F of the methanogenic A<sub>1</sub>A<sub>0</sub> ATP synthase and its interaction with the nucleotide-binding subunit B**

Shovanlal Gayen<sup>#,1</sup>, Subramanian Vivekanandan<sup>#</sup>, Goran Biuković<sup>1</sup>, Gerhard Grüber<sup>\*,1</sup>  
and Ho Sup Yoon<sup>\*</sup>

School of Biological Sciences, Nanyang Technological University, 60 Nanyang Drive,  
Singapore 637551

<sup>#</sup> Authors have equal contribution

<sup>1</sup> Section of Structure and Function of Molecular Motors

<sup>\*</sup>To whom all correspondence should be addressed:

Gerhard Grüber, Tel.: 65-6316 2989; Fax: 65-6791 3856;

E-mail: [ggrueber@ntu.edu.sg](mailto:ggrueber@ntu.edu.sg)

and

Ho Sup Yoon, Telephone: 65-6316 2846; Fax: 65-6791 3856

E-mail: [hsyoon@ntu.edu.sg](mailto:hsyoon@ntu.edu.sg)

## Supplemental Figure Legends

**Figure S1.** Amino acid sequence of the F subunit with a survey of the short- and medium-range NOE connectivities, which were used to establish the sequence-specific  $^1\text{H}$  NMR assignment and to identify elements of regular secondary structure.

**Figure S2.** 2D  $^1\text{H}$ - $^{15}\text{N}$  HSQC of F subunit with different peak shapes and intensities are indicating chemical exchange phenomena. The unlabelled peaks are single sharp resonances having line-width of about 25-30 Hz. The peaks marked in single letter amino acid residue with asterisks indicate residues undergoing chemical exchange. The peaks marked in single letter amino acid residue with subscripts *a* and *b* indicate multiple peaks for the same residue. For example, A35, K101, and V45 have multiple peaks and are marked with subscripts *a* and *b*.

**Figure S3.** 1D projection of representative  $^1\text{H}$ - $^{15}\text{N}$  HSQC peaks of F subunit are plotted in the same Hz/pt scale. The column 1 shows single sharp peaks, column 2 single peak with exchange broadening and column 3 shows two or more peaks for the same residue. The residue along with the sequence number is marked in the left side of the peak.

**Figure S4:** Bar diagram showing intensities of the HSQC cross peaks as a function of residue position of the F subunit. Intensities were measured using SPARKY. Intensity of peaks could not be obtained for residues because of signal overlap are no assignments were made.

**Figure S5:** Schematic representation of the secondary structure of subunit F is shown. Dotted lines indicate interstrand hydrogen bonds and solid lines indicate long-range  $^1\text{H}$ - $^1\text{H}$  distances in 4 parallel  $\beta$ -strands of the F subunit.

**Figure S1**

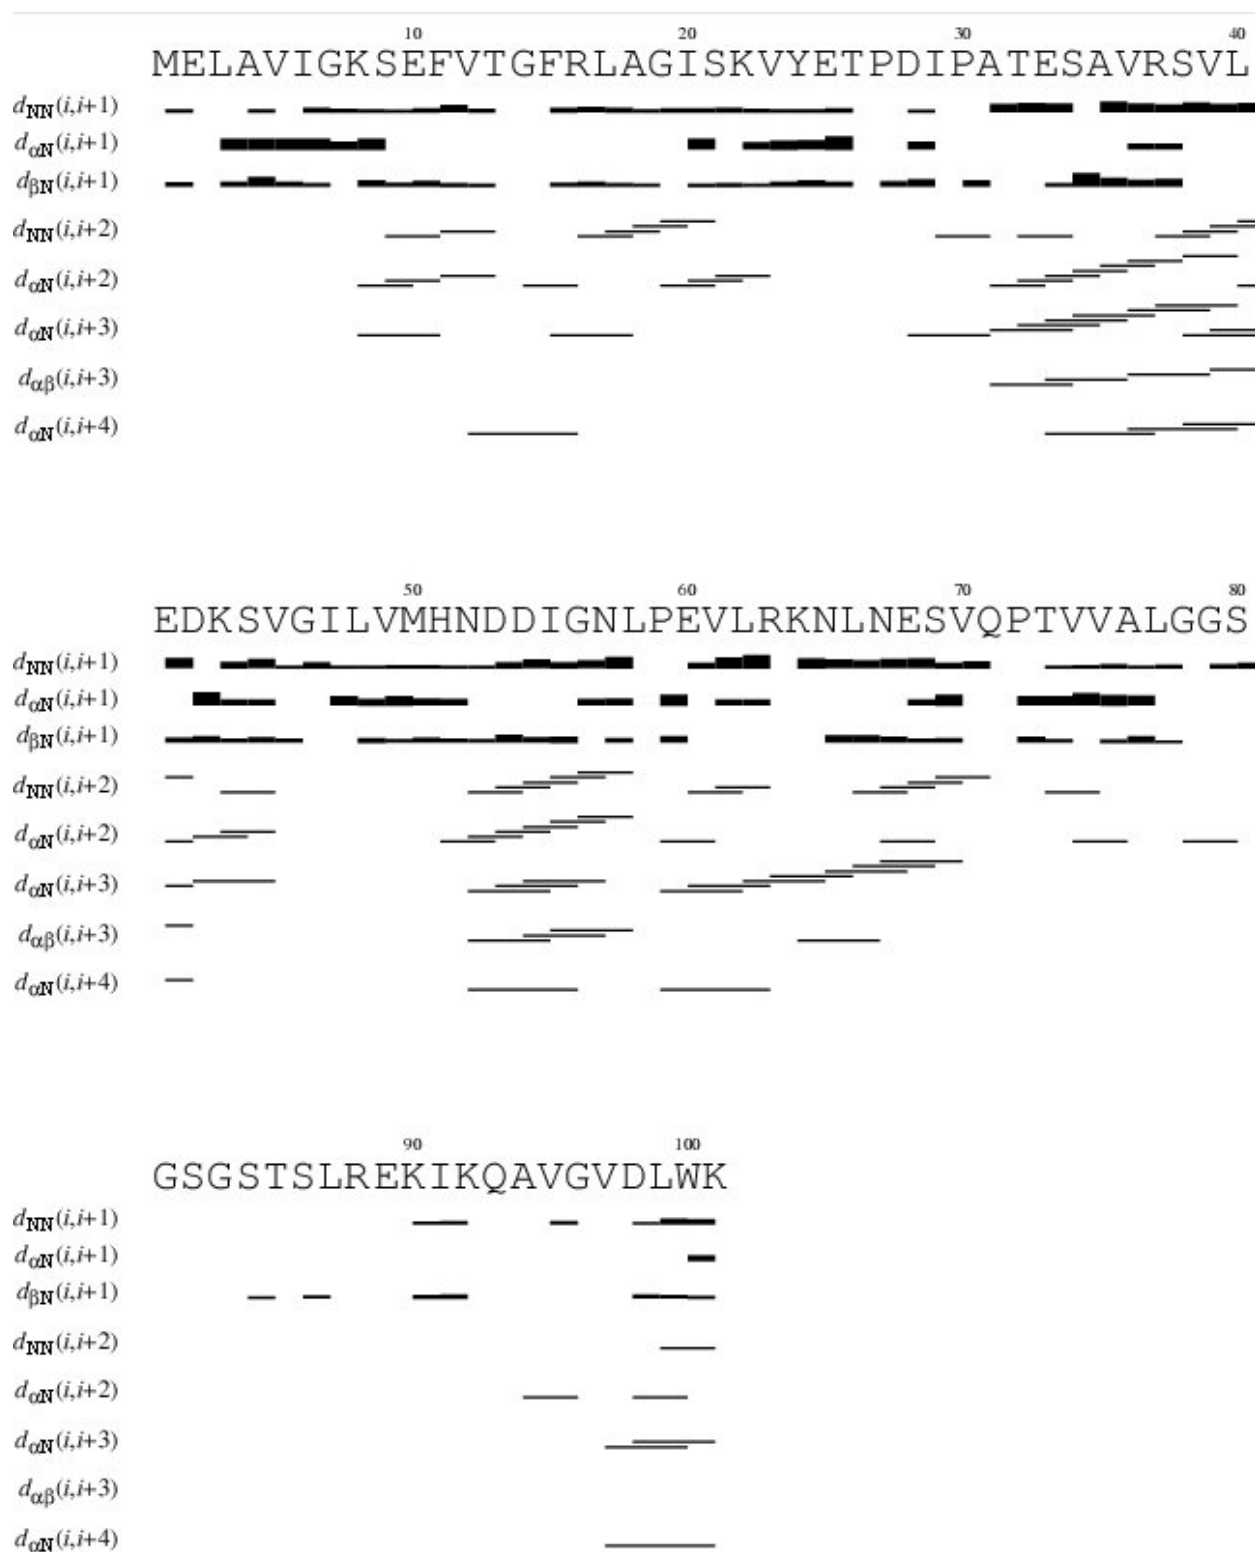

**Figure S2**

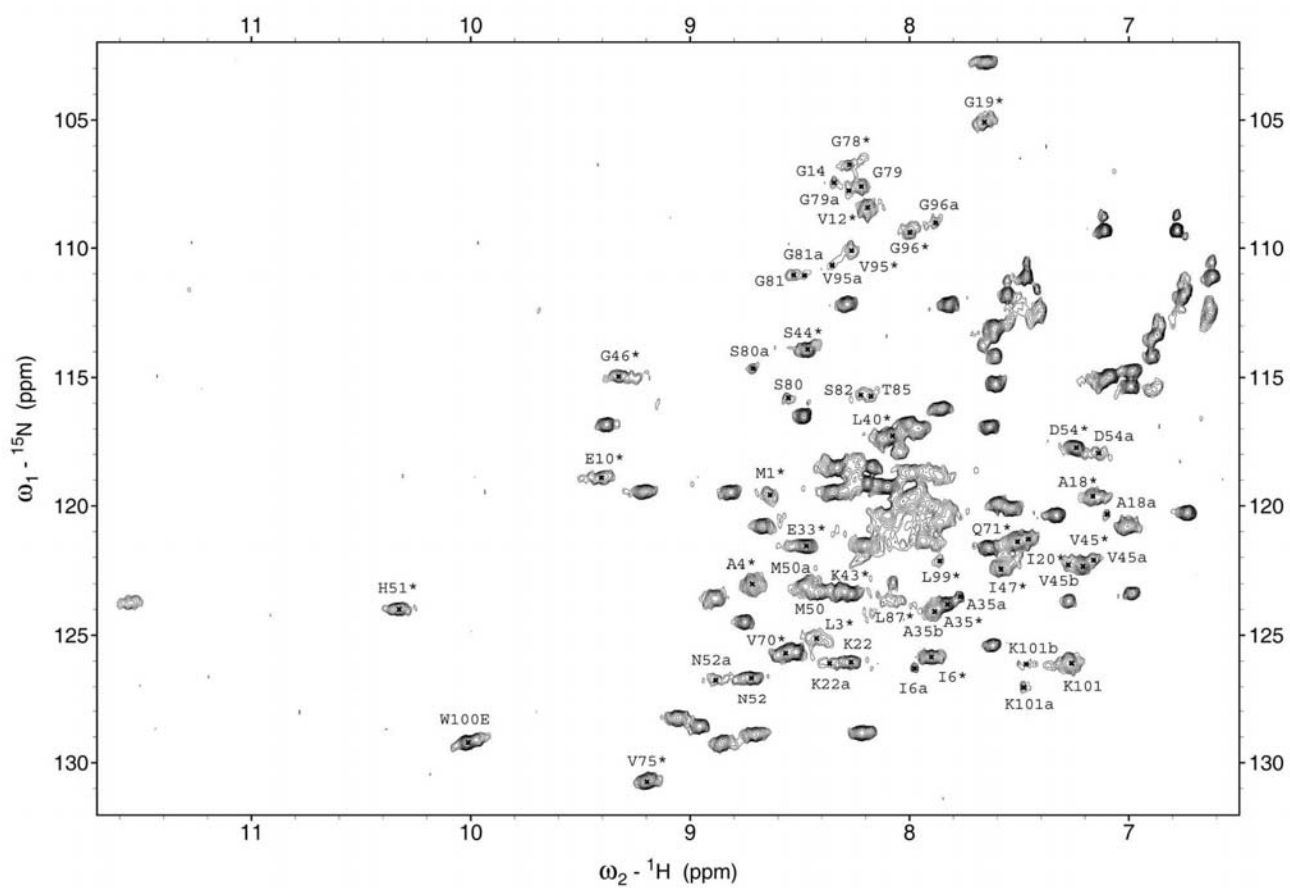

**Figure S3**

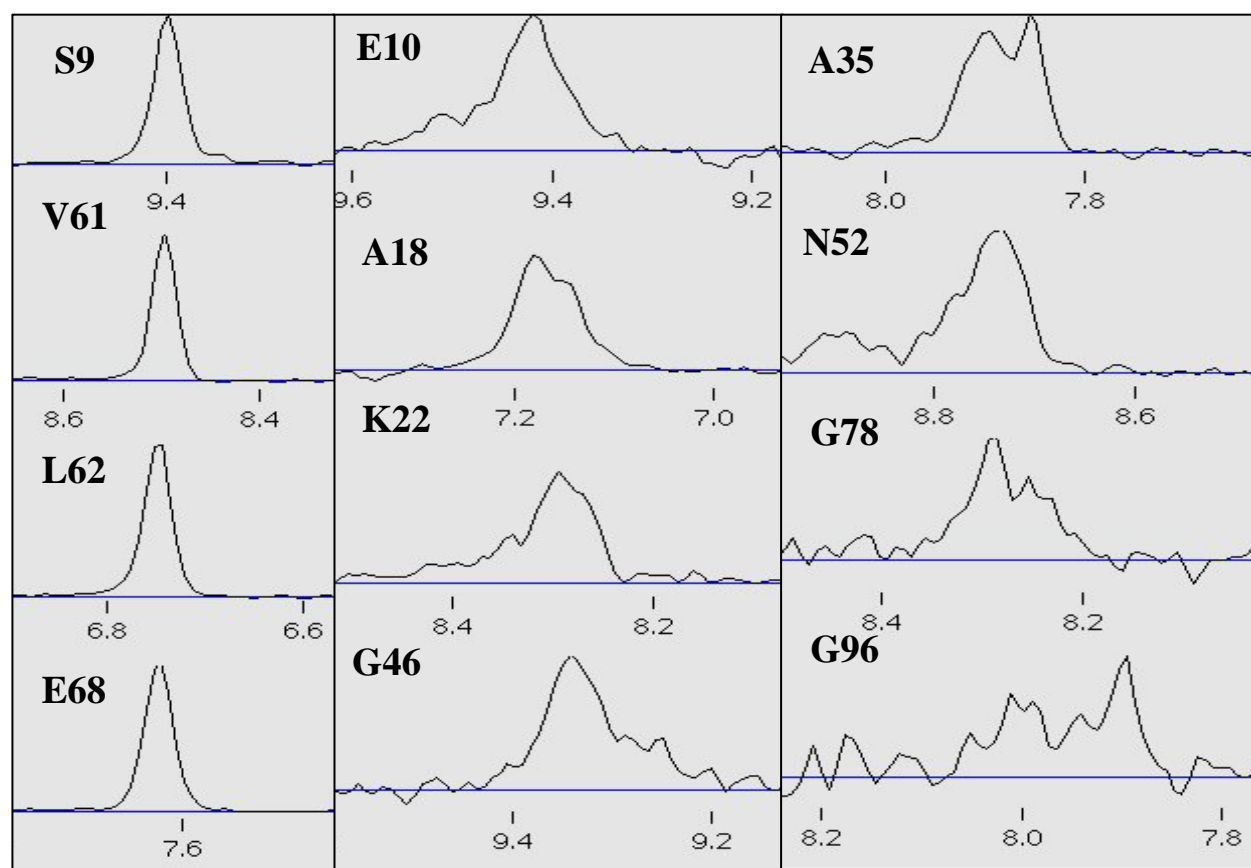

Figure S4

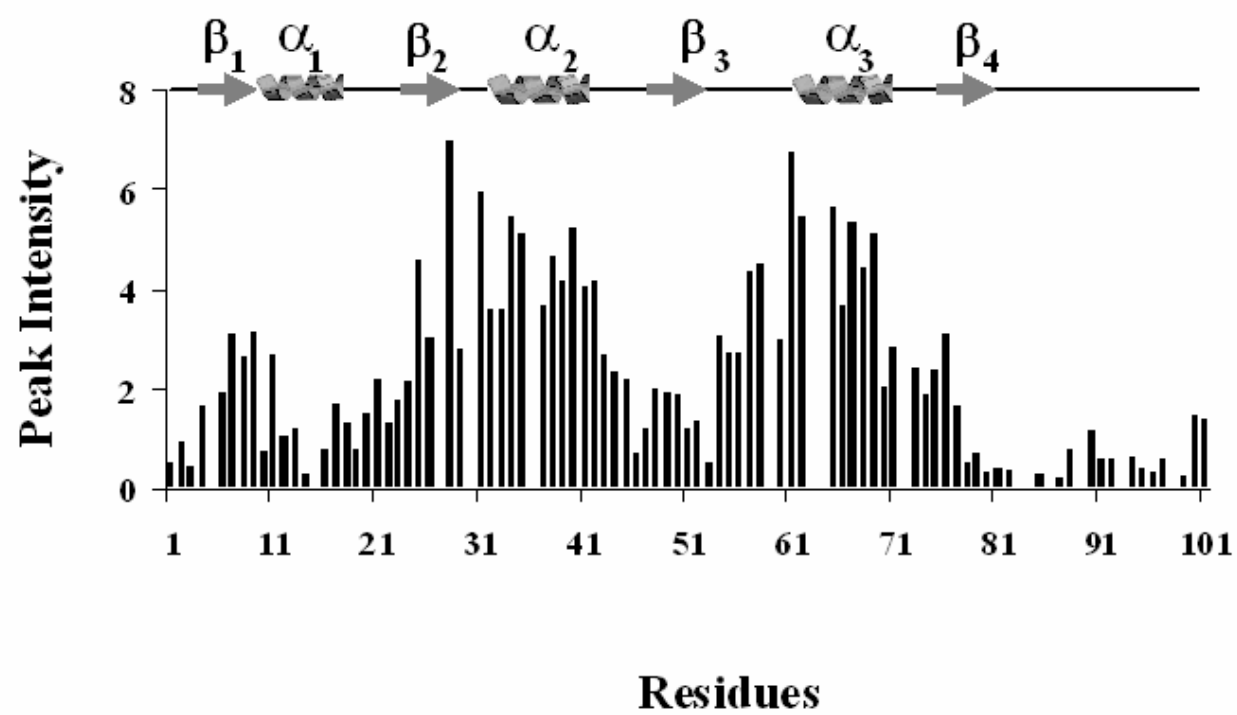

**Figure S5**

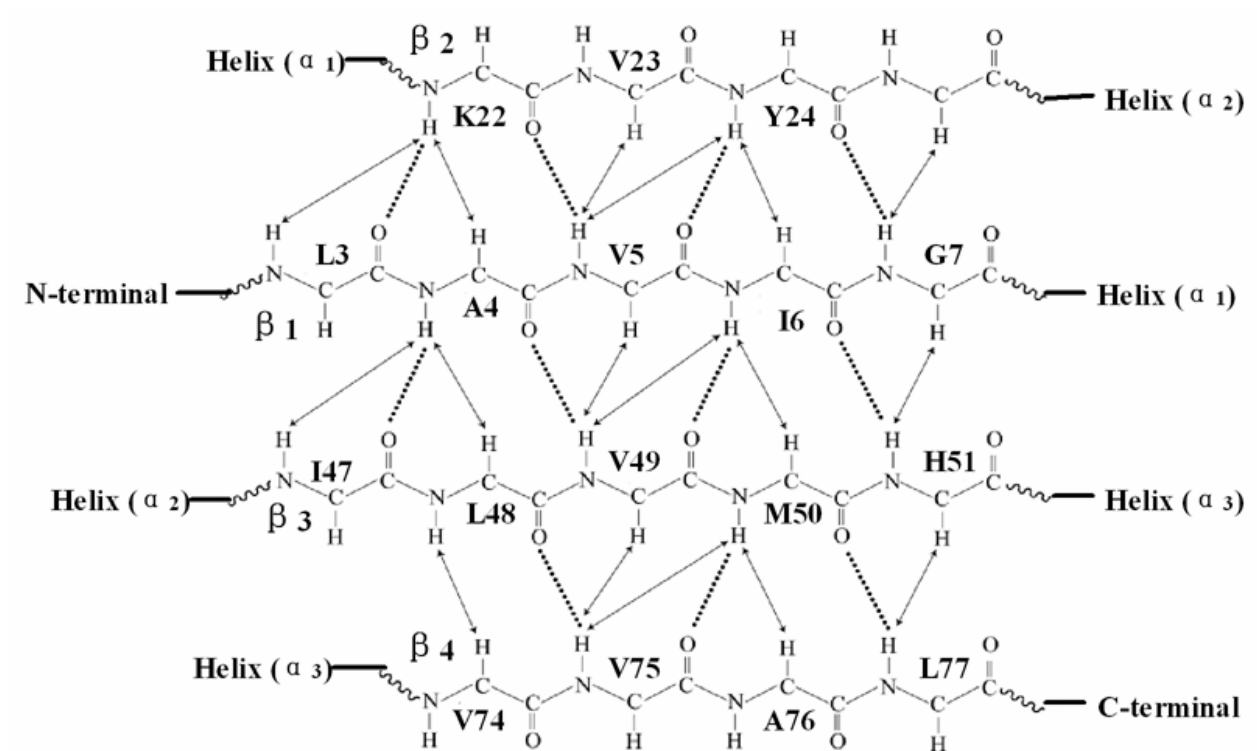

Supplement: Supplementary file 1 [file 4680241]
